# Supplementary material
Source: publisher figshare collection journal article supplement (https://acs.figshare.com/ndownloader/files/4372537)
Supplement: Supplementary file 1 [file 4372537]

Supporting Information for:

# Nucleation Control in the Aggregative Growth of Bismuth Nanocrystals

*Vernal N. Richards, Shawn P. Shields, and William E. Buhro\**

Department of Chemistry and Center for Materials Innovation, Washington University,  
St. Louis, Missouri 63130-4899.

## **Table of Contents:**

|                                                                                                                                                                   |    |
|-------------------------------------------------------------------------------------------------------------------------------------------------------------------|----|
| <b>Table S1.</b> List of abbreviations and their definitions..                                                                                                    | S2 |
| <b>Figure S1.</b> CSDs for the Bi-nanocrystal growth conducted at a Na[N(SiMe <sub>3</sub> ) <sub>2</sub> ]<br>concentration of 0.049 M.                          | S2 |
| <b>Figure S2.</b> Nucleation function and Gaussian fit for nanocrystal growth conducted at a<br>Na[N(SiMe <sub>3</sub> ) <sub>2</sub> ] concentration of 0.062 M. | S3 |
| <b>Figure S3.</b> Nucleation function and Gaussian fit for nanocrystal growth conducted at a<br>Na[N(SiMe <sub>3</sub> ) <sub>2</sub> ] concentration of 0.076 M. | S3 |
| <b>Figure S4.</b> Nucleation function and Gaussian fit for nanocrystal growth conducted at a<br>Na[N(SiMe <sub>3</sub> ) <sub>2</sub> ] concentration of 0.087 M. | S4 |
| <b>Figure S5.</b> Nucleation function and Gaussian fit for nanocrystal growth conducted at a<br>Na[N(SiMe <sub>3</sub> ) <sub>2</sub> ] concentration of 0.099 M. | S4 |
| <b>Figure S6.</b> Kinetic data and the eq-1 fit for nanocrystal growth conducted at a<br>Na[N(SiMe <sub>3</sub> ) <sub>2</sub> ] concentration of 0.063 M.        | S5 |
| <b>Figure S7.</b> Kinetic data and the eq-1 fit for nanocrystal growth conducted at a<br>Na[N(SiMe <sub>3</sub> ) <sub>2</sub> ] concentration of 0.076 M.        | S5 |
| <b>Figure S8.</b> Kinetic data and the eq-1 fit for nanocrystal growth conducted at a<br>Na[N(SiMe <sub>3</sub> ) <sub>2</sub> ] concentration of 0.087 M.        | S6 |
| <b>Figure S9.</b> Kinetic data and the eq-1 fit for nanocrystal growth conducted at a<br>Na[N(SiMe <sub>3</sub> ) <sub>2</sub> ] concentration of 0.099 M.        | S6 |

**Table S1.** List of abbreviations and their definitions.

|                        |                                                                                           |
|------------------------|-------------------------------------------------------------------------------------------|
| CSD                    | Nanocrystal size distribution                                                             |
| $\Gamma$               | Nucleation rate (in $\text{s}^{-1}$ )                                                     |
| $\Gamma_{\text{max}}$  | Maximum nucleation rate (in $\text{s}^{-1}$ )                                             |
| $\Delta t_{\text{n}}$  | Time window for nucleation (in min)                                                       |
| $\tau_{\text{n}}$      | Time at which $\Gamma_{\text{max}}$ is achieved (in min)                                  |
| $\tau_{\text{OR}}$     | Onset time for Ostwald Ripening ( in min)                                                 |
| $V_{\text{crit}}$      | Volume of the critical aggregate (in $\text{nm}^3$ )                                      |
| $F_{\text{crit}}$      | Fraction of the aggregates in the CSD having the critical volume                          |
| $\bar{V}(t)$           | Nanocrystal mean volume at time $t$ (in $\text{nm}^3$ )                                   |
| $\bar{V}_{\text{lim}}$ | Final mean nanocrystal volume (in $\text{nm}^3$ ), at the end of the active-growth regime |
| $k_{\text{g}}$         | Growth rate (in $\text{s}^{-1}$ )                                                         |
| $k_{\text{OR}}$        | Ostwald Ripening rate (in $\text{s}^{-1}$ )                                               |
| $n$                    | Avrami exponent (unitless)                                                                |

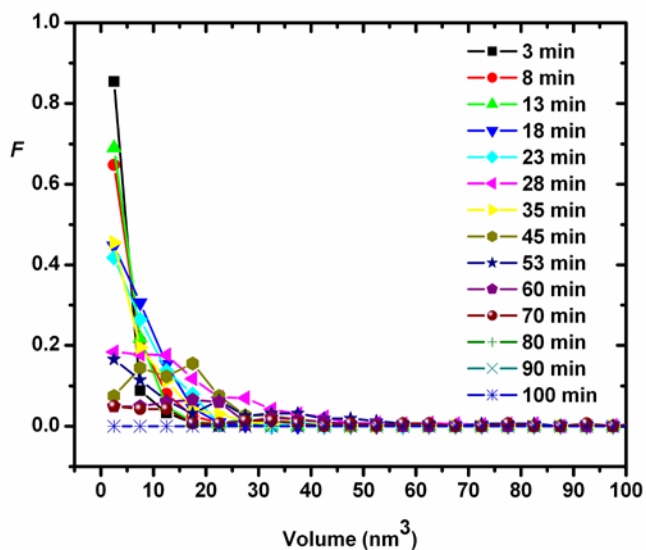

**Figure S1.** CSDs for the Bi nanocrystal growth conducted at  $\text{Na}[\text{N}(\text{SiMe}_3)_2]$  concentration of 0.049 M, at the times indicated in the inset legend. The data were binned using a bin size of  $5 \text{ nm}^3$ . Peaks at the critical-aggregate size are not readily evident.

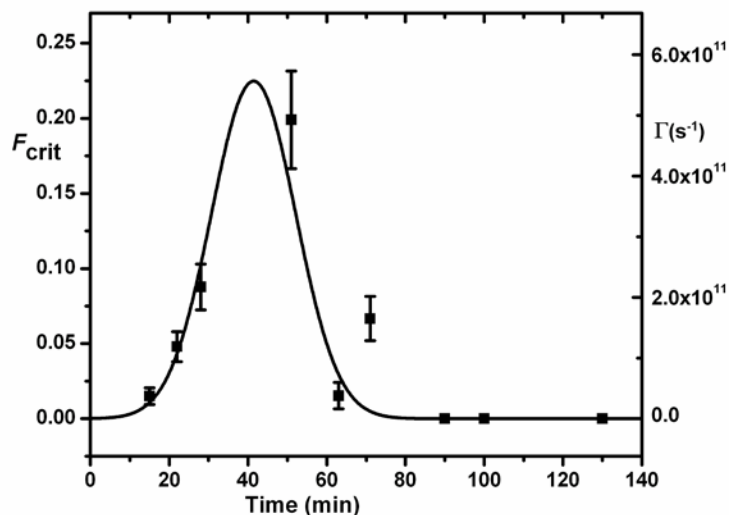

**Figure S2.** Nucleation function and Gaussian fit for the synthesis conducted at a  $\text{Na}[\text{N}(\text{SiMe}_3)_2]$  concentration of 0.063 M. The left and right axes correspond to the critical-aggregate fraction  $F_{\text{crit}}$  and the scaled nucleation rate  $\Gamma$ , respectively.

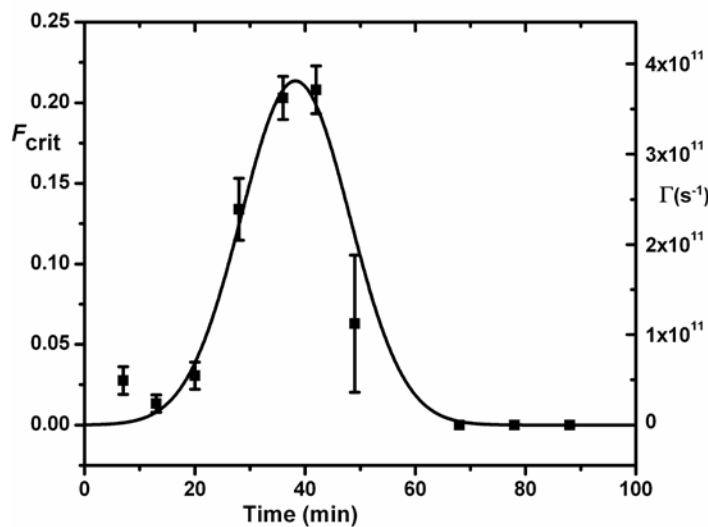

**Figure S3.** Nucleation function and Gaussian fit for the synthesis conducted at a  $\text{Na}[\text{N}(\text{SiMe}_3)_2]$  concentration of 0.076 M. The left and right axes correspond to the critical-aggregate fraction  $F_{\text{crit}}$  and the scaled nucleation rate  $\Gamma$ , respectively.

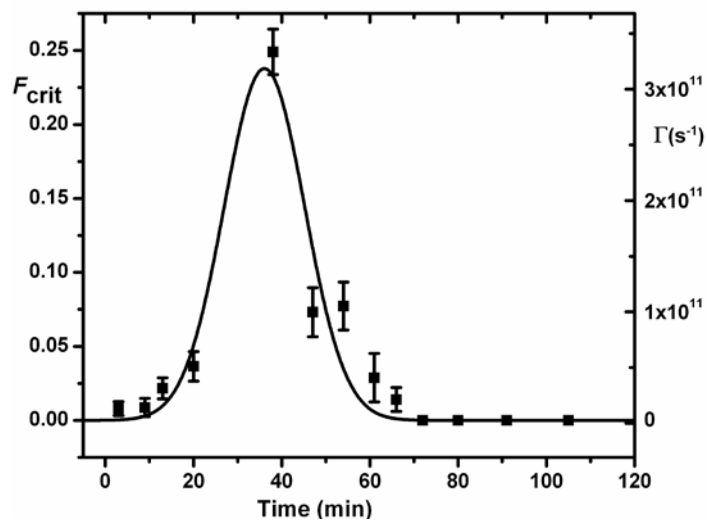

**Figure S4.** Nucleation function and Gaussian fit for the synthesis conducted at a  $\text{Na}[\text{N}(\text{SiMe}_3)_2]$  concentration of 0.087 M. The left and right axes correspond to the critical-aggregate fraction  $F_{\text{crit}}$  and the scaled nucleation rate  $\Gamma$ , respectively.

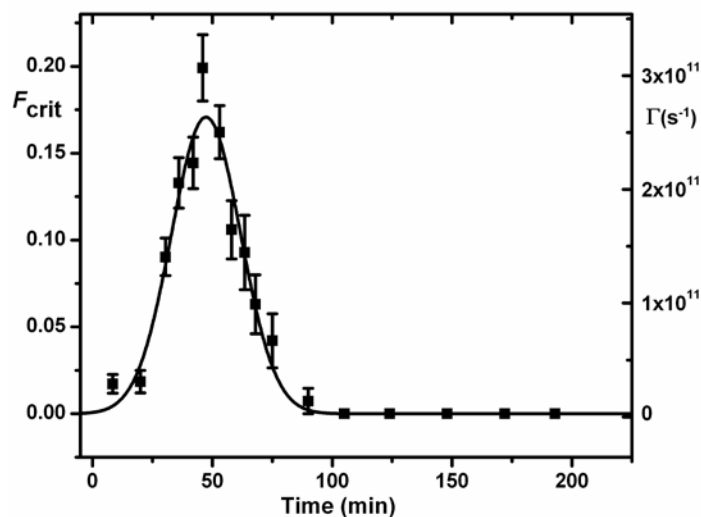

**Figure S5.** Nucleation function and Gaussian fit for the synthesis conducted at a  $\text{Na}[\text{N}(\text{SiMe}_3)_2]$  concentration of 0.099 M. The left and right axes correspond to the critical-aggregate fraction  $F_{\text{crit}}$  and the scaled nucleation rate  $\Gamma$ , respectively.

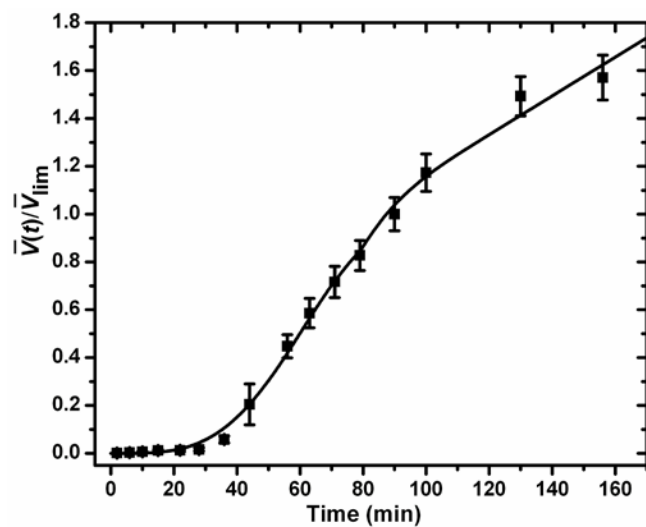

**Figure S6.** Kinetic data and the eq-1 fit for nanocrystal growth conducted at a  $\text{Na}[\text{N}(\text{SiMe}_3)_2]$  concentration of 0.063 M.

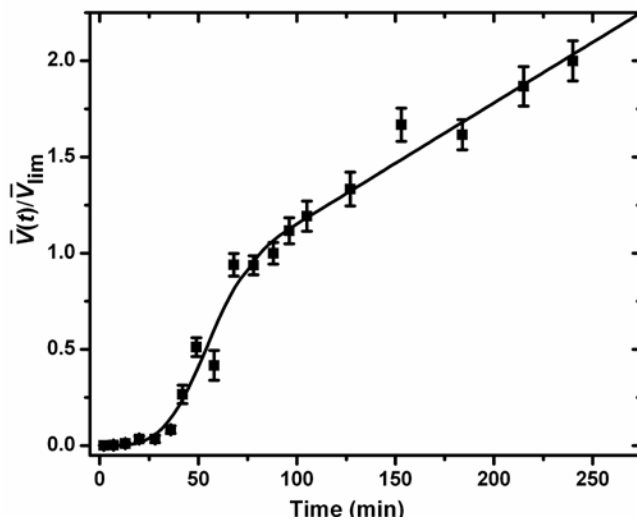

**Figure S7.** Kinetic data and the eq-1 fit for nanocrystal growth conducted at a  $\text{Na}[\text{N}(\text{SiMe}_3)_2]$  concentration of 0.076 M.

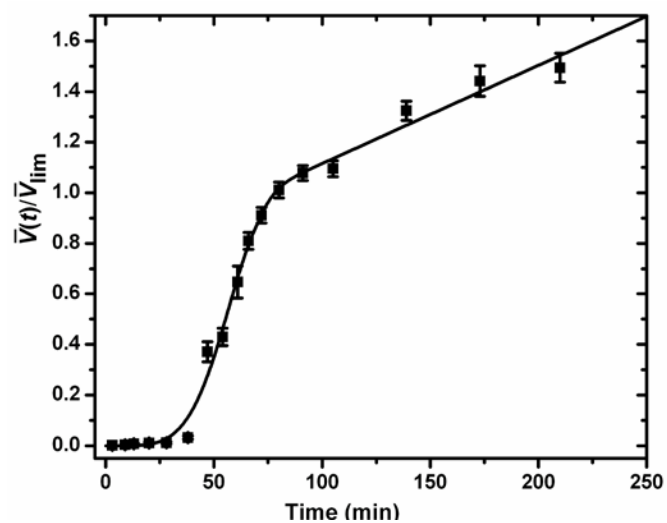

**Figure S8.** Kinetic data and the eq-1 fit for nanocrystal growth conducted at a  $\text{Na}[\text{N}(\text{SiMe}_3)_2]$  concentration of 0.087 M.

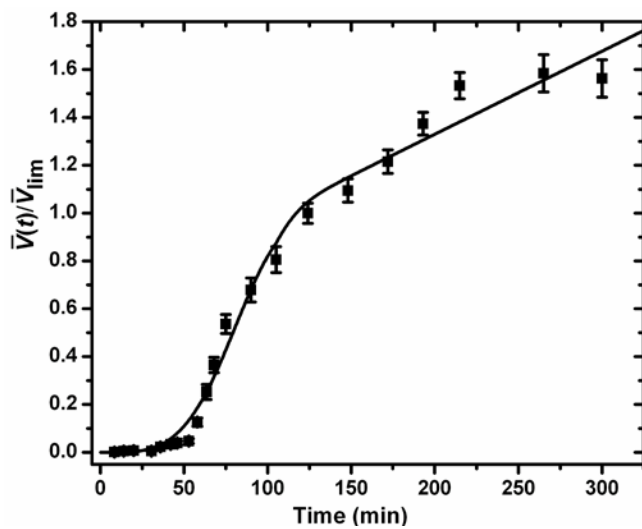

**Figure S9.** Kinetic data and the eq-1 fit for nanocrystal growth conducted at a  $\text{Na}[\text{N}(\text{SiMe}_3)_2]$  concentration of 0.099 M.
